# Supplementary material for: Scalable colloidal synthesis of Bi2Te2.7Se0.3 plate-like particles give access to a high-performing n-type thermoelectric material for low temperature application
Source: Royal Society of Chemistry journal article supplement (doi:10.1039/d0na00691b), 2020-01-01
Supplement: d0na00691b1.pdf [file d0na00691b1.pdf]

**Electronic Supplementary Information for:**

**Scalable colloidal synthesis of Bi<sub>2</sub>Te<sub>2.7</sub>Se<sub>0.3</sub> plate-like particles give access to high-performing n-type thermoelectric material for low temperature application**

Nagendra S. Chauhan,<sup>1\*</sup> Oleg I. Lebedev,<sup>2</sup> Kirill Kovnir,<sup>3,4</sup> Sergey V. Pyrlin,<sup>5</sup> Luis S.A. Marques,<sup>5</sup> Marta M.D. Ramos,<sup>5</sup> Brian A. Korgel,<sup>6</sup> Yury V. Kolenko<sup>1\*</sup>

<sup>1</sup>*International Iberian Nanotechnology Laboratory (INL), Braga 4715-330, Portugal*

<sup>2</sup>*Laboratoire CRISMAT, UMR 6508, CNRS-Ensicaen, Caen 14050, France*

<sup>3</sup>*Department of Chemistry, Iowa State University, Ames, Iowa 50011, USA*

<sup>4</sup>*Ames Laboratory, U.S. Department of Energy, Ames, Iowa 50011, USA*

<sup>5</sup>*Centro de Física das Universidades do Minho e do Porto, Universidade do Minho, 4710-057, Braga, Portugal*

<sup>6</sup>*McKetta Department of Chemical Engineering, The University of Texas at Austin, Austin, Texas 78712, USA*

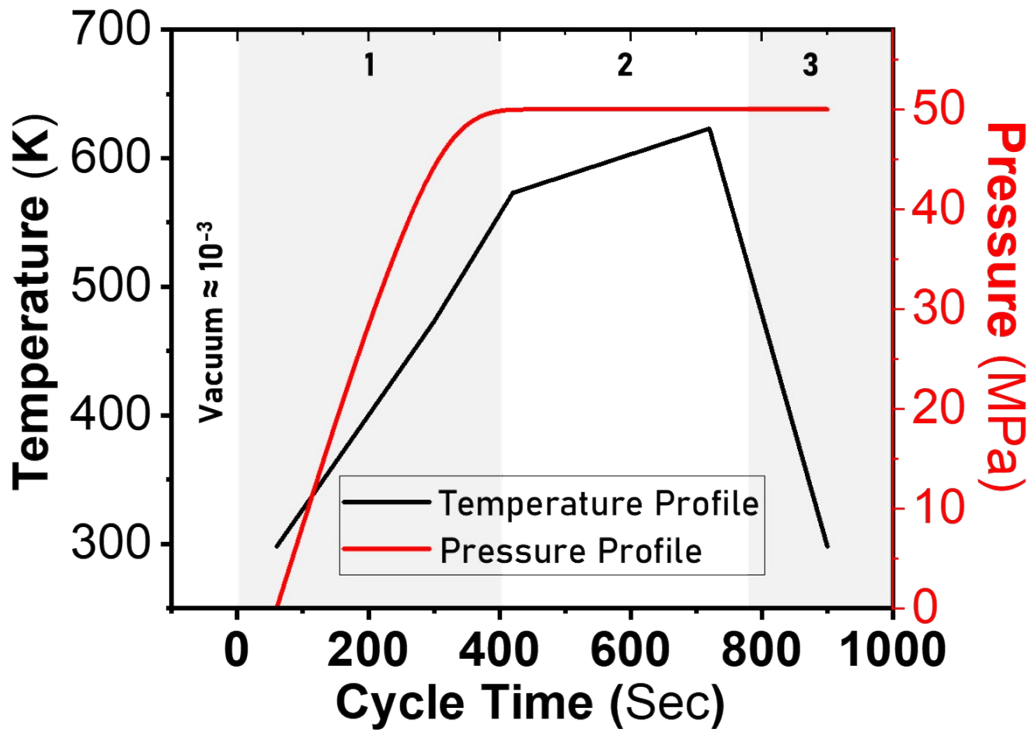

Fig. S1. Sintering profile for spark plasma sintered  $\text{Bi}_2\text{Te}_{2.7}\text{Se}_{0.3}$ .

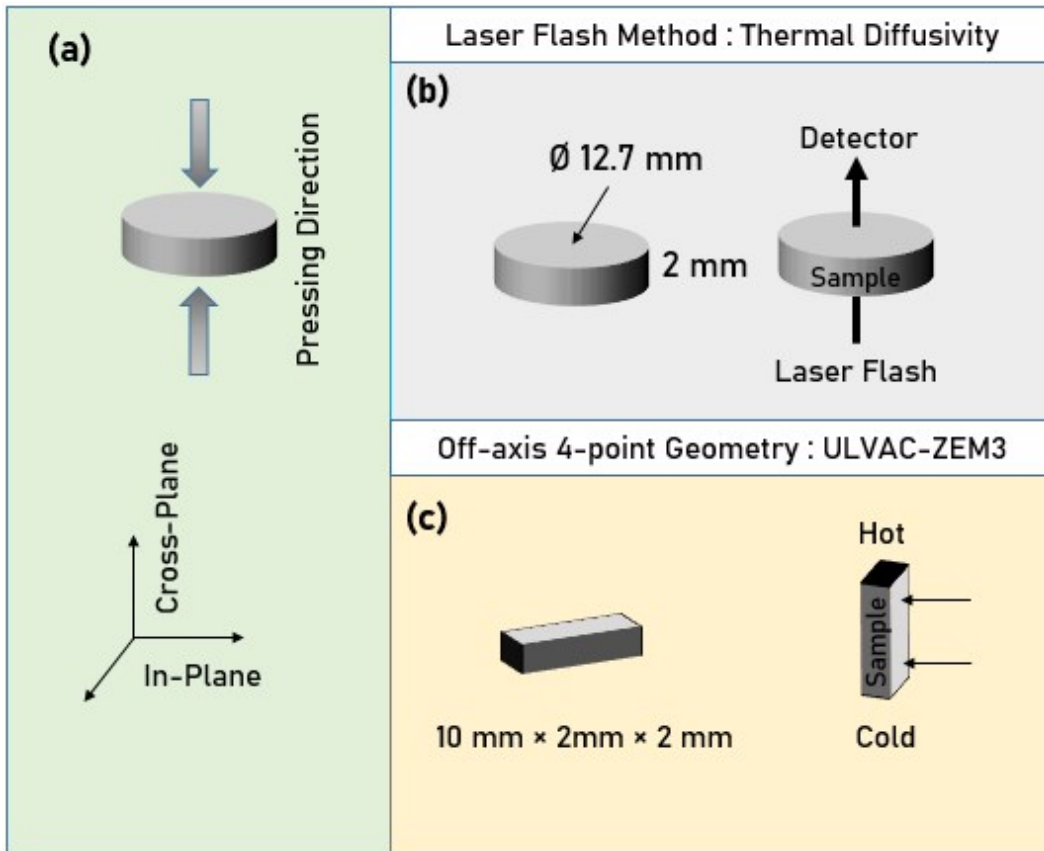

Fig. S2. Schematic representation of direction and geometry for measurement of (a) thermal, and (b) electrical characterisation.

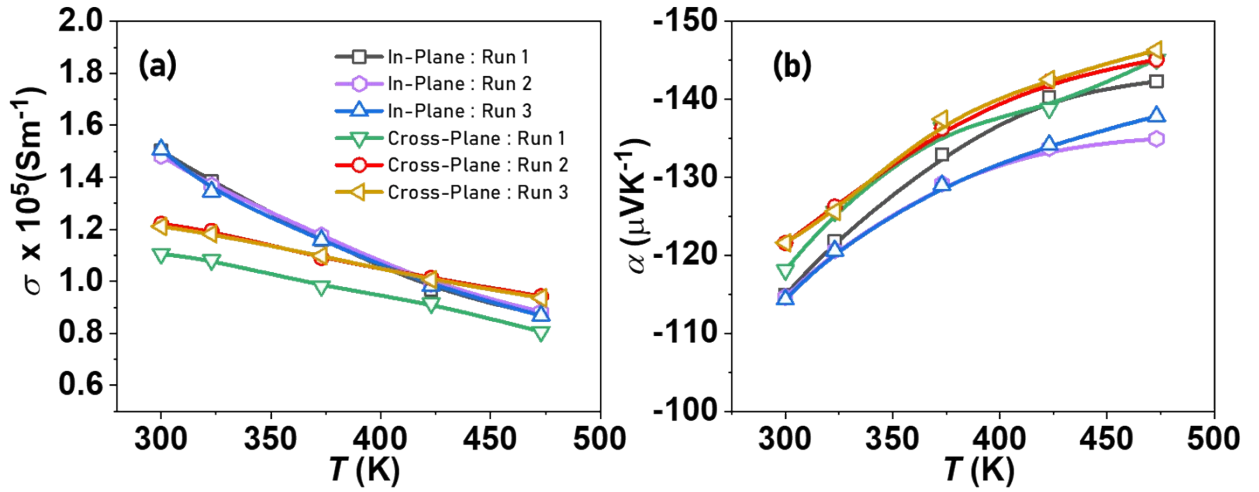

**Fig. S3:** Repeated measurement of temperature dependent electrical transport for synthesized  $\text{Bi}_2\text{Te}_{2.7}\text{Se}_{0.3}$  alloys (a) electrical conductivity, and (b) Seebeck coefficient.

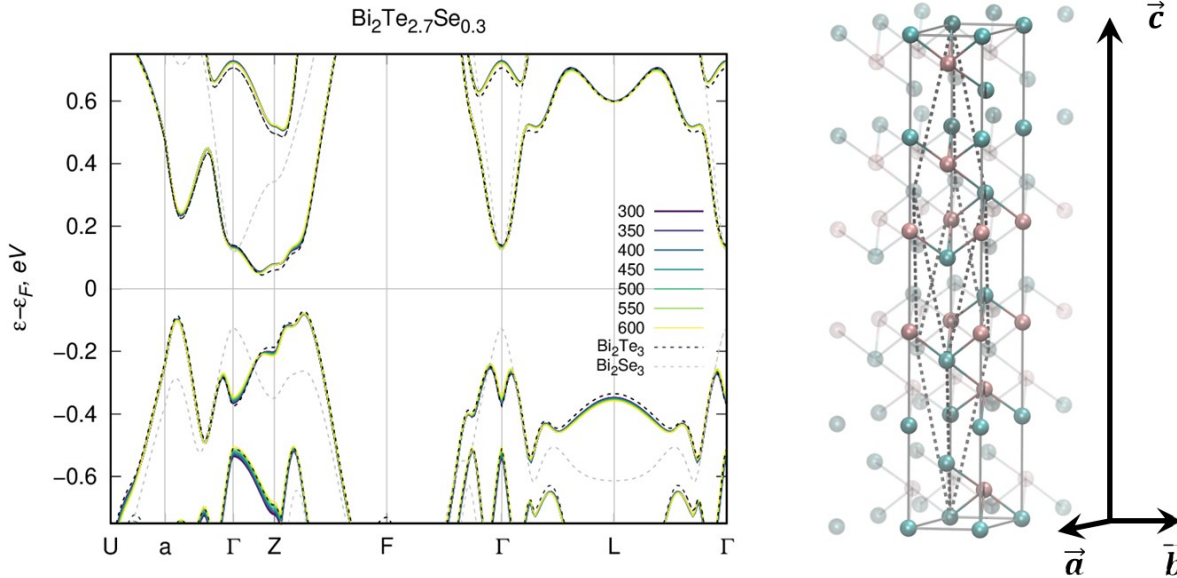

**Fig. S4.** Left: doping and temperature effect on band structure. Special points correspond to the first Brillouin zone of rhombohedral lattice.<sup>1,2</sup> Right: correspondence between conventional hexagonal (solid lines) and primitive rhombohedral lattice (dashed lines).

#### References:

1. Setyawan, W.; Curtarolo, S., High-throughput electronic band structure calculations: Challenges and tools. *Computational materials science* **2010**, 49, (2), 299-312.
2. Witting, I. T.; Chasapis, T. C.; Ricci, F.; Peters, M.; Heinz, N. A.; Hautier, G.; Snyder, G. J., The thermoelectric properties of bismuth telluride. *Advanced Electronic Materials* **2019**, 5, (6), 1800904.
